# Supplementary material for: Exosomes derived from dental pulp stem cells accelerate cutaneous wound healing by enhancing angiogenesis via the Cdc42/p38 MAPK pathway
Source: PubMed Central journal article supplement — Int J Mol Med. 2022 Oct 31;50(6):143. doi: 10.3892/ijmm.2022.5199 (PMC9662140; doi:10.3892/ijmm.2022.5199), 2022-10-31

Figure S1. Identification of DPSC-Exos. (A) The morphology of DPSC-Exos was observed using transmission electron microscopy. Scale bar, 100 nm. (B) Western blot analysis of exosomal markers (CD9 and CD63) and cytosolic marker ( $\beta$ -actin) expression from DPSC-Exos. (C) Nanoparticle size distribution of DPSC-Exos detected by nanoparticle tracking analysis. DPSC, dental pulp stem cell; Exo, exosome.

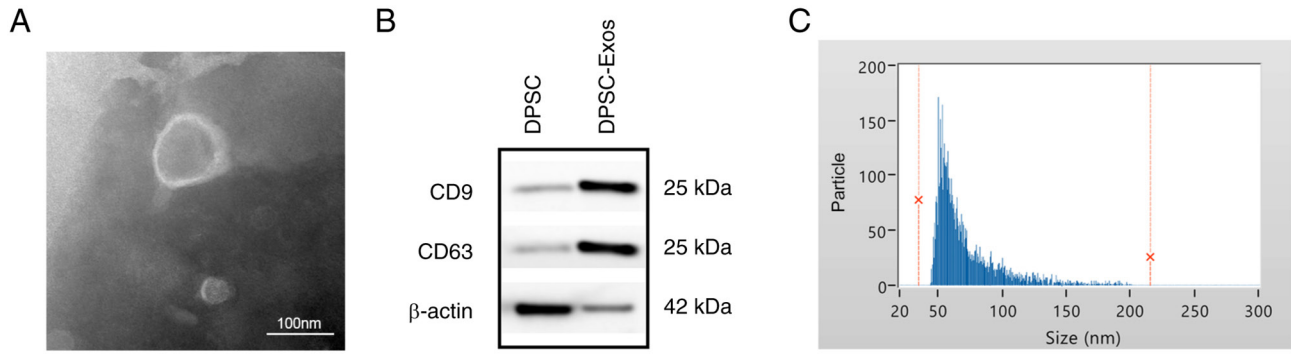

Supplement: Supplementary_Data1.pdf [file Supplementary_Data1.pdf]
